# Supplementary material
Source: Springer Nature journal article supplement (https://www.springermedizin.de/resource/supplementary/12889_2013_6474_MOESM1_ESM.pdf/9498296)

# Community

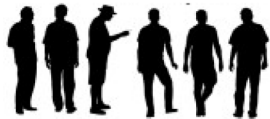

1 2 3 4 5 6

Rotation system

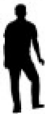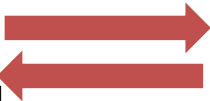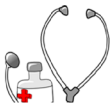

Consultation

Counselling

# Clinic

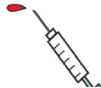

CD4 drawing

Drug collection

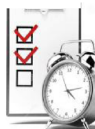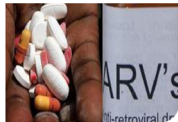

Supplement: MOESM1 [file 9498296]
